# Supplementary material
Source: PubMed Central journal article supplement (PMC3826704)
Supplement: supp_cvt215_cvt215supp_fig2.pdf [file supp_cvt215_cvt215supp_fig2.pdf]

**A**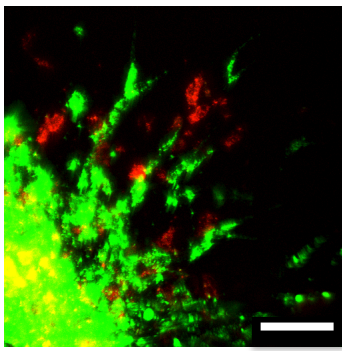

Bcl-2-EC  
SMC

**B**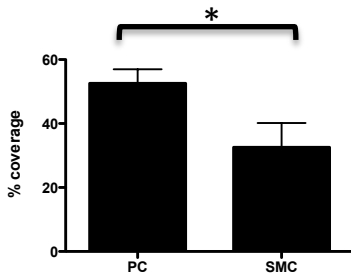**C**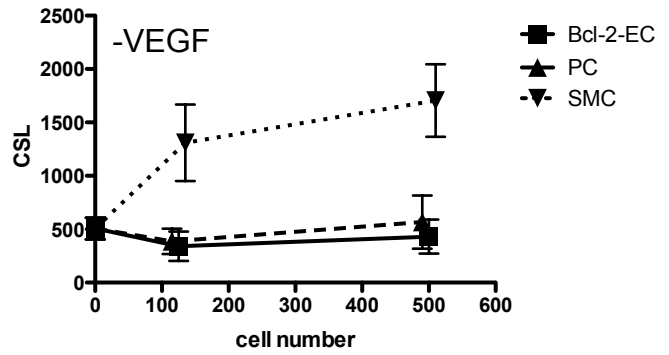**D**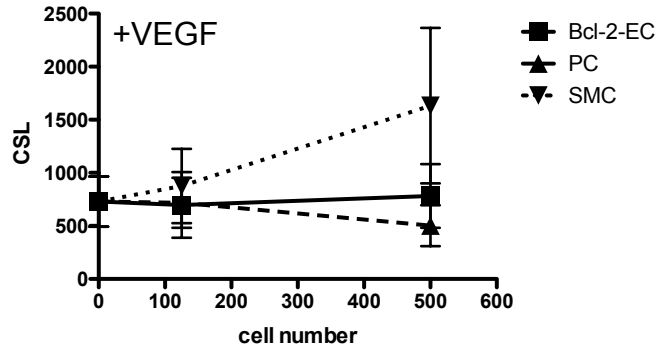

**Supplemental Figure 2. Sprout formation by mixed spheroids Bcl-2-EC, PC, and SMC.** (A) Confocal fluorescence images of 500 Bcl-2-ECs (PKH67 green-labeled cells) with SMCs (PKH26 red labeled cells) mixed spheroid collagen gels with 100 ng/ml VEGF-A. Scale bars is 100  $\mu$ m (B) Graph depicts % PC or SMC coverage of Bcl-2-EC sprouts in mixed spheroids in presence of VEGF-A. (\*) represents statistically significant difference between groups by unpaired two tailed t-test. (C,D) CSL  $\pm$  SD of Bcl-2-EC sprouts in presence of increasing numbers of Bcl-2-ECs, PCs, or SMCs in mixed spheroids without (C) or with (D) 100 ng/ml VEGF-A after 24 hr. Two-way ANOVA analysis of Bcl-2-EC only and mixed Bcl-2-EC/SMC demonstrated statistically significant stimulation with increasing SMCs (without VEGF, N=120,  $p < 0.0001$  ; with VEGF, N=120 spheroids from 2 independent experiments,  $p < 0.0001$ )
